# Supplementary material for: Association of regular plasmapheresis donation with serum protein and electrolyte levels: a multicentre cross-sectional study in China
Source: PubMed Central journal article supplement — BMJ Open. 2024 Oct 15;14(10):e085786. doi: 10.1136/bmjopen-2024-085786 (PMC11481140; doi:10.1136/bmjopen-2024-085786), 2024-10-15
Supplement: bmjopen-14-10-s001.pdf [file bmjopen-14-10-s001.pdf]

**Supplementary Table 1.** Plasmapheresis donor selection criteria in China.

**Supplementary Table 2.** Association between recent plasmapheresis donation frequency and risk of low serum protein and electrolyte.

**Supplementary Table 3.** Association between total number of lifetime plasmapheresis donation and risk of low serum protein and electrolyte.

**Supplementary Table 4.** Alb level and related influencing factors.

**Supplementary Table 1. Plasmapheresis donor selection criteria in China.**

| Parameters                                | Values                                                                                                                                                      |
|-------------------------------------------|-------------------------------------------------------------------------------------------------------------------------------------------------------------|
| Age                                       | 18-60 years                                                                                                                                                 |
| Weight                                    | ≥50Kg for males and ≥45Kg for females                                                                                                                       |
| Blood pressure                            | Systolic between 90 and 140 mm Hg vs. diastolic between 60 and 90 mm Hg vs. pulse pressure difference ≥ 30 mm Hg                                            |
| Pulse                                     | Regular pulse between 60-100 beats per minute                                                                                                               |
| Temperature                               | Normal                                                                                                                                                      |
| Hb                                        | ≥120g/L for males and ≥110g/L for females                                                                                                                   |
| Serum/plasma protein                      | Serum protein ≥60g/L; plasma protein ≥50g/L                                                                                                                 |
| Alanine aminotransferase (ALT)            | ≤50 μ/L for both males and females                                                                                                                          |
| Hepatitis B virus surface antigen (HBsAg) | Negative                                                                                                                                                    |
| Hepatitis C virus antibody (HCVAb)        | Negative                                                                                                                                                    |
| HIV-1 and HIV-2 antibody                  | Negative                                                                                                                                                    |
| Syphilis                                  | Negative                                                                                                                                                    |
| Donation interval                         | 2 weeks                                                                                                                                                     |
| Serum/plasma electrophoresis              | Compared with the normal plasma electrophoretogram, the electrophoretogram bands of donors did not increase or decrease. Albumin content not less than 50%. |
| Temporary deferral                        | Prospective plasmapheresis donor ineligible in donation for a time-limited period and can return for further donation                                       |
| Permanent deferral                        | Prospective plasmapheresis donor unable to donate forever for one or a variety of reasons                                                                   |

**Supplementary Table 2. Association between recent plasmapheresis donation frequency and risk of low serum protein and electrolyte.**

| Measurements         |                      | Male                   |                                            |                 |                | Female                 |                                            |                 |                |
|----------------------|----------------------|------------------------|--------------------------------------------|-----------------|----------------|------------------------|--------------------------------------------|-----------------|----------------|
|                      |                      | New donors*<br>(n=384) | Recent Donation frequency (times per year) |                 |                | New donors*<br>(n=342) | Recent Donation frequency (times per year) |                 |                |
|                      |                      |                        | 1-8<br>(n=107)                             | 9-16<br>(n=109) | >16<br>(n=174) |                        | 1-8<br>(n=108)                             | 9-16<br>(n=106) | >16<br>(n=163) |
| Low IgG              | No (%) events        | 19 (4.9)               | 5 (4.7)                                    | 7 (6.4)         | 7 (4.0)        | 5 (1.5)                | 3 (2.8)                                    | 1 (0.9)         | 3 (1.8)        |
|                      | p (unadjusted model) | Reference group        | 0.694                                      | 0.733           | 0.607          | Reference group        | 0.288                                      | 0.851           | 0.518          |
|                      | p (adjusted model)#  | Reference group        | 0.649                                      | 0.743           | 0.448          | Reference group        | 0.068                                      | 0.901           | 0.298          |
| Low TSP              | No (%) events        | 52 (13.5)              | 11 (10.3)                                  | 11 (10.1)       | 24 (13.8)      | 36 (10.5)              | 12 (11.1)                                  | 10 (9.4)        | 22 (13.5)      |
|                      | p (unadjusted model) | Reference group        | 0.435                                      | 0.367           | 0.622          | Reference group        | 0.979                                      | 0.755           | 0.252          |
|                      | p (adjusted model)#  | Reference group        | 0.531                                      | 0.472           | 0.776          | Reference group        | 0.398                                      | 0.756           | 0.205          |
| Low Alb              | No (%) events        | 69 (17.97)             | 23 (21.5)                                  | 18 (16.5)       | 50 (28.7)      | 104 (30.41)            | 41 (37.9)                                  | 37 (34.9)       | 67 (41.1)      |
|                      | p (unadjusted model) | Reference group        | 0.537                                      | 0.784           | 0.014          | Reference group        | 0.17                                       | 0.402           | 0.042          |
|                      | p (adjusted model)#  | Reference group        | 0.963                                      | 0.284           | 0.557          | Reference group        | 0.136                                      | 0.624           | 0.25           |
| Low ACCA             | No (%) events        | 32 (8.33)              | 3 (2.8)                                    | 3 (2.8)         | 4 (2.3)        | 22 (6.43)              | 4 (3.7)                                    | 3 (2.8)         | 3 (1.8)        |
|                      | p (unadjusted model) | Reference group        | 0.09                                       | 0.081           | 0.038          | Reference group        | 0.34                                       | 0.216           | 0.075          |
|                      | p (adjusted model)#  | Reference group        | 0.096                                      | 0.051           | 0.017          | Reference group        | 0.87                                       | 0.701           | 0.548          |
| Low K <sup>+</sup>   | No (%) events        | 34 (8.9)               | 8 (7.5)                                    | 10 (9.2)        | 10 (5.7)       | 20 (5.8)               | 4 (3.7)                                    | 2 (1.9)         | 5 (3.1)        |
|                      | p (unadjusted model) | Reference group        | 0.623                                      | 0.991           | 0.164          | Reference group        | 0.326                                      | 0.117           | 0.206          |
|                      | p (adjusted model)#  | Reference group        | 0.251                                      | 0.398           | 0.038          | Reference group        | 0.358                                      | 0.09            | 0.105          |
| Low Mg <sup>2+</sup> | No (%) events        | 41 (10.7)              | 19 (7.8)                                   | 7 (8.4)         | 8 (12.9)       | 43 (12.6)              | 11 (10.2)                                  | 16 (15.1)       | 19 (11.7)      |
|                      | p (unadjusted model) | Reference group        | 0.565                                      | 0.199           | 0.217          | Reference group        | 0.17                                       | 0.424           | 0.389          |
|                      | p adjusted model)#   | Reference group        | 0.876                                      | 0.232           | 0.184          | Reference group        | 0.458                                      | 0.355           | 0.392          |

Adjusted for multiple comparisons by Bonferroni correction.

\*New donors served as the control group and each experimental group was compared with the control group.

# Adjusted for age, BMI, living place, meat intake, education, smoking and drinking, annual household income, physical activity (female donors additionally adjusted menstrual history).

Abbreviations: TSP, total serum protein; IgG, immunoglobulin G; Alb, albumin; Hb, hemoglobin; ACCA, albumin-corrected calcium; IQR, interquartile range.

**Supplementary Table 3. Association between total number of lifetime plasmapheresis donation and risk of low serum protein and electrolyte.**

| Measurement          |                                 | Male                |                                    |               |             |                     |                                    | Female        |             |  |
|----------------------|---------------------------------|---------------------|------------------------------------|---------------|-------------|---------------------|------------------------------------|---------------|-------------|--|
|                      |                                 | New donors* (n=384) | Total number of lifetime donations |               |             | New donors* (n=342) | Total number of lifetime donations |               |             |  |
|                      |                                 |                     | 1-50 (n=245)                       | 51-100 (n=83) | >100 (n=62) |                     | 1-50 (n=228)                       | 51-100 (n=89) | >100 (n=60) |  |
| Low IgG              | No (%) events                   | 19 (4.9)            | 14 (5.7)                           | 4 (4.8)       | 1 (1.6)     | 5 (1.5)             | 4 (1.8)                            | 1 (1.1)       | 2 (3.3)     |  |
|                      | p (unadjusted model)            | Reference group     | 0.942                              | 0.706         | 0.424       | Reference group     | 0.622                              | 0.971         | 0.174       |  |
|                      | p (adjusted model) <sup>#</sup> | Reference group     | 0.988                              | 0.814         | 0.156       | Reference group     | 0.207                              | 0.772         | 0.244       |  |
| Low TSP              | No (%) events                   | 52 (13.5)           | 20 (8.2)                           | 16 (19.3)     | 10 (16.1)   | 36 (10.5)           | 21 (9.2)                           | 12 (13.5)     | 11 (18.3)   |  |
|                      | p (unadjusted model)            | Reference group     | 0.042                              | 0.117         | 0.139       | Reference group     | 0.449                              | 0.284         | 0.033       |  |
|                      | p (adjusted model) <sup>#</sup> | Reference group     | 0.144                              | 0.111         | 0.381       | Reference group     | 0.543                              | 0.145         | 0.439       |  |
| Low Alb              | No (%) events                   | 69 (17.97)          | 49 (20.0)                          | 22 (26.5)     | 20 (33.3)   | 104 (30.41)         | 83 (36.4)                          | 34 (38.2)     | 27 (45.0)   |  |
|                      | p (unadjusted model)            | Reference group     | 0.604                              | 0.089         | 0.036       | Reference group     | 0.145                              | 0.214         | 0.047       |  |
|                      | p (adjusted model) <sup>#</sup> | Reference group     | 0.978                              | 0.782         | 0.388       | Reference group     | 0.132                              | 0.657         | 0.456       |  |
| Low ACCA             | No (%) events                   | 31 (8.07)           | 3 (1.2)                            | 3 (3.6)       | 4 (6.5)     | 22 (6.43)           | 3 (1.3)                            | 3 (3.4)       | 4 (6.7)     |  |
|                      | p (unadjusted model)            | Reference group     | 0.004                              | 0.187         | 0.995       | Reference group     | 0.056                              | 0.997         | 0.762       |  |
|                      | p (adjusted model) <sup>#</sup> | Reference group     | 0.018                              | 0.101         | 0.106       | Reference group     | 0.824                              | 0.997         | 0.337       |  |
| Low K <sup>+</sup>   | No (%) events                   | 34 (8.9)            | 17 (6.9)                           | 8 (9.6)       | 3 (4.8)     | 20 (5.8)            | 6 (2.6)                            | 4 (4.5)       | 1 (1.7)     |  |
|                      | p (unadjusted model)            | Reference group     | 0.307                              | 0.81          | 0.263       | Reference group     | 0.057                              | 0.729         | 0.25        |  |
|                      | p (adjusted model) <sup>#</sup> | Reference group     | 0.055                              | 0.329         | 0.452       | Reference group     | 0.068                              | 0.487         | 0.118       |  |
| Low Mg <sup>2+</sup> | No (%) events                   | 41 (10.7)           | 22 (9.7)                           | 18 (20.7)     | 6 (10.3)    | 43 (12.6)           | 22 (9.6)                           | 18 (20.2)     | 6 (10.0)    |  |
|                      | p (unadjusted model)            | Reference group     | 0.088                              | 0.582         | 0.829       | Reference group     | 0.106                              | 0.088         | 0.387       |  |
|                      | p (adjusted model) <sup>#</sup> | Reference group     | 0.238                              | 0.662         | 0.272       | Reference group     | 0.263                              | 0.088         | 0.407       |  |

Adjusted for multiple comparisons by Bonferroni correction.

\*New donors served as the control group and each experimental group was compared with the control group.

<sup>#</sup> Adjusted for age, BMI, living place, meat intake, education, smoking and drinking, annual household income, physical activity (female donors additionally adjusted menstrual history).

Abbreviations: TSP, total serum protein; IgG, immunoglobulin G; Alb, albumin; Hb, hemoglobin; ACCA, albumin-corrected calcium; IQR, interquartile range.

**Supplementary Table 4. Alb level and related influencing factors.**

|                               | Unstandardized Coefficients |            | Standardized Coefficients | t      | Sig.  |
|-------------------------------|-----------------------------|------------|---------------------------|--------|-------|
|                               | B                           | Std. Error | Beta                      |        |       |
| <b>Female donors</b>          |                             |            |                           |        |       |
| (Constant)                    | 3.686                       | 0.059      |                           | 62.683 | 0     |
| Living place                  | 0.023                       | 0.004      | 0.283                     | 6.273  | 0     |
| Age                           | -0.001                      | 0.001      | -0.139                    | -2.253 | 0.025 |
| BMI                           | 0                           | 0.001      | 0.005                     | 0.108  | 0.914 |
| Education                     | 0.006                       | 0.008      | 0.042                     | 0.759  | 0.448 |
| Annual household income(yuan) | -0.021                      | 0.007      | -0.13                     | -2.98  | 0.3   |
| Physical activity             | 0.008                       | 0.008      | 0.043                     | 0.955  | 0.34  |
| Meat intake                   | 0.013                       | 0.009      | 0.057                     | 1.35   | 0.178 |
| Smoking                       | 0.013                       | 0.019      | 0.03                      | 0.673  | 0.501 |
| Drinking                      | -0.022                      | 0.021      | -0.048                    | -1.072 | 0.284 |
| Menstrual history             | 0.023                       | 0.014      | 0.081                     | 1.593  | 0.112 |
| <b>Male donors</b>            |                             |            |                           |        |       |
| (Constant)                    | 3.704                       | 0.053      |                           | 69.957 | 0     |
| Living place                  | 0.05                        | 0.007      | 0.317                     | 7.066  | 0     |
| Age                           | -0.002                      | 0          | -0.21                     | -4.552 | 0     |
| BMI                           | 0                           | 0.001      | -0.004                    | -0.1   | 0.921 |
| Education                     | 0.002                       | 0.006      | 0.014                     | 0.306  | 0.76  |
| Annual household income(yuan) | -0.003                      | 0.008      | -0.018                    | -0.409 | 0.683 |
| Physical activity             | -0.006                      | 0.008      | -0.03                     | -0.712 | 0.477 |
| Meat intake                   | 0.01                        | 0.011      | 0.039                     | 0.906  | 0.366 |
| Smoking                       | 0.01                        | 0.006      | 0.063                     | 1.485  | 0.138 |
| Drinking                      | -0.004                      | 0.009      | -0.016                    | -0.381 | 0.704 |
